# Supplementary material for: Efficacy and Safety of Pyrotinib Versus T-DM1 in HER2+ Metastatic Breast Cancer Patients Pre-Treated With Trastuzumab and a Taxane: A Bayesian Network Meta-Analysis
Source: PubMed Central journal article supplement (PMC8127838; doi:10.3389/fonc.2021.608781), 2021-05-03
Supplement: Image_1.pdf [file Image_1.pdf]

(A)

|                       |                       |                       |                       |                        |                       |                       |                        |                       |
|-----------------------|-----------------------|-----------------------|-----------------------|------------------------|-----------------------|-----------------------|------------------------|-----------------------|
| T-DM1                 | 1.71<br>(0.15, 20.17) | 1.80<br>(0.08, 41.04) | 4.69<br>(0.26, 93.58) | 2.90<br>(0.10, 96.04)  | 1.30<br>(0.03, 62.42) | 0.61<br>(0.03, 11.51) | 3.21<br>(0.29, 36.86)  | 1.29<br>(0.04, 40.47) |
| 0.58<br>(0.05, 6.54)  | Lap-Cap               | 1.03<br>(0.16, 7.20)  | 2.75<br>(0.48, 15.88) | 1.64<br>(0.15, 19.25)  | 0.73<br>(0.04, 17.44) | 0.36<br>(0.05, 2.38)  | 1.86<br>(0.06, 59.10)  | 0.75<br>(0.06, 8.01)  |
| 0.56<br>(0.02, 12.27) | 0.97<br>(0.14, 6.14)  | Tra-Cap               | 2.69<br>(0.36, 18.02) | 1.60<br>(0.07, 33.45)  | 0.72<br>(0.07, 7.99)  | 0.35<br>(0.03, 3.60)  | 1.78<br>(0.03, 86.87)  | 0.73<br>(0.03, 13.05) |
| 0.21<br>(0.01, 3.84)  | 0.36<br>(0.06, 2.06)  | 0.37<br>(0.06, 2.77)  | Cap                   | 0.59<br>(0.03, 11.92)  | 0.27<br>(0.01, 6.47)  | 0.13<br>(0.02, 0.82)  | 0.68<br>(0.02, 29.86)  | 0.27<br>(0.01, 5.03)  |
| 0.34<br>(0.01, 10.20) | 0.61<br>(0.05, 6.89)  | 0.63<br>(0.03, 15.37) | 1.69<br>(0.08, 32.75) | Ner                    | 0.44<br>(0.01, 25.41) | 0.21<br>(0.01, 4.83)  | 1.13<br>(0.01, 73.16)  | 0.45<br>(0.02, 12.92) |
| 0.77<br>(0.02, 35.59) | 1.36<br>(0.06, 25.88) | 1.38<br>(0.13, 13.49) | 3.71<br>(0.15, 74.98) | 2.25<br>(0.04, 94.45)  | Per-Tra-Cap           | 0.48<br>(0.01, 12.90) | 2.44<br>(0.03, 225.71) | 1.02<br>(0.02, 37.77) |
| 1.64<br>(0.09, 36.51) | 2.81<br>(0.42, 20.43) | 2.89<br>(0.28, 39.75) | 7.87<br>(1.22, 56.51) | 4.67<br>(0.21, 104.34) | 2.10<br>(0.08, 70.65) | Pyr-Cap               | 5.35<br>(0.10, 271.31) | 2.13<br>(0.09, 52.51) |
| 0.31<br>(0.03, 3.47)  | 0.54<br>(0.02, 16.14) | 0.56<br>(0.01, 29.46) | 1.47<br>(0.03, 65.24) | 0.88<br>(0.01, 67.58)  | 0.41<br>(0.01, 39.63) | 0.19<br>(0.01, 9.73)  | Ate-T-DM1              | 0.41<br>(0.01, 26.02) |
| 0.78<br>(0.02, 24.22) | 1.33<br>(0.12, 15.83) | 1.36<br>(0.08, 30.67) | 3.70<br>(0.20, 82.82) | 2.21<br>(0.08, 62.85)  | 0.98<br>(0.03, 54.72) | 0.47<br>(0.02, 11.39) | 2.46<br>(0.04, 200.77) | Ner-Cap               |

(B)

|                       |                      |                       |                       |                       |                      |                       |
|-----------------------|----------------------|-----------------------|-----------------------|-----------------------|----------------------|-----------------------|
| T-DM1                 | 0.52<br>(0.16, 1.85) | 0.55<br>(0.05, 5.61)  | 0.50<br>(0.08, 3.18)  | 0.76<br>(0.05, 11.10) | 0.20<br>(0.03, 1.24) | 0.74<br>(0.18, 2.67)  |
| 1.93<br>(0.54, 6.37)  | Lap-Cap              | 1.05<br>(0.14, 7.33)  | 0.95<br>(0.23, 3.73)  | 1.46<br>(0.13, 15.99) | 0.38<br>(0.11, 1.40) | 1.42<br>(0.24, 8.34)  |
| 1.82<br>(0.18, 20.95) | 0.95<br>(0.14, 7.11) | Tra-Cap               | 0.89<br>(0.23, 3.60)  | 1.37<br>(0.38, 4.90)  | 0.37<br>(0.04, 4.10) | 1.35<br>(0.09, 21.48) |
| 2.01<br>(0.31, 13.25) | 1.05<br>(0.27, 4.44) | 1.12<br>(0.28, 4.37)  | Cap                   | 1.52<br>(0.22, 9.46)  | 0.41<br>(0.06, 2.86) | 1.50<br>(0.15, 14.89) |
| 1.32<br>(0.09, 20.89) | 0.68<br>(0.06, 7.49) | 0.73<br>(0.20, 2.61)  | 0.66<br>(0.11, 4.45)  | Per-Tra-Cap           | 0.27<br>(0.02, 4.05) | 0.99<br>(0.05, 21.85) |
| 4.97<br>(0.81, 29.74) | 2.60<br>(0.71, 9.33) | 2.71<br>(0.24, 26.91) | 2.45<br>(0.35, 16.36) | 3.76<br>(0.25, 54.25) | Pyr-Cap              | 3.70<br>(0.37, 32.69) |
| 1.34<br>(0.38, 5.42)  | 0.70<br>(0.12, 4.08) | 0.74<br>(0.05, 10.92) | 0.67<br>(0.07, 6.76)  | 1.01<br>(0.05, 21.17) | 0.27<br>(0.03, 2.72) | Ate-T-DM1             |

T-DM1, trastuzumab emtansine; Lap, lapatinib; Tra, trastuzumab; Cap, capecitabine; Ner, neratinib; Per, pertuzumab; Pyr, pyrotinib; Ate, atezolizumab
