# Supplementary material for: Efficacy and Safety of Pyrotinib Versus T-DM1 in HER2+ Metastatic Breast Cancer Patients Pre-Treated With Trastuzumab and a Taxane: A Bayesian Network Meta-Analysis
Source: PubMed Central journal article supplement (PMC8127838; doi:10.3389/fonc.2021.608781), 2021-05-03
Supplement: Image_2.pdf [file Image_2.pdf]

(A) Rank Probability

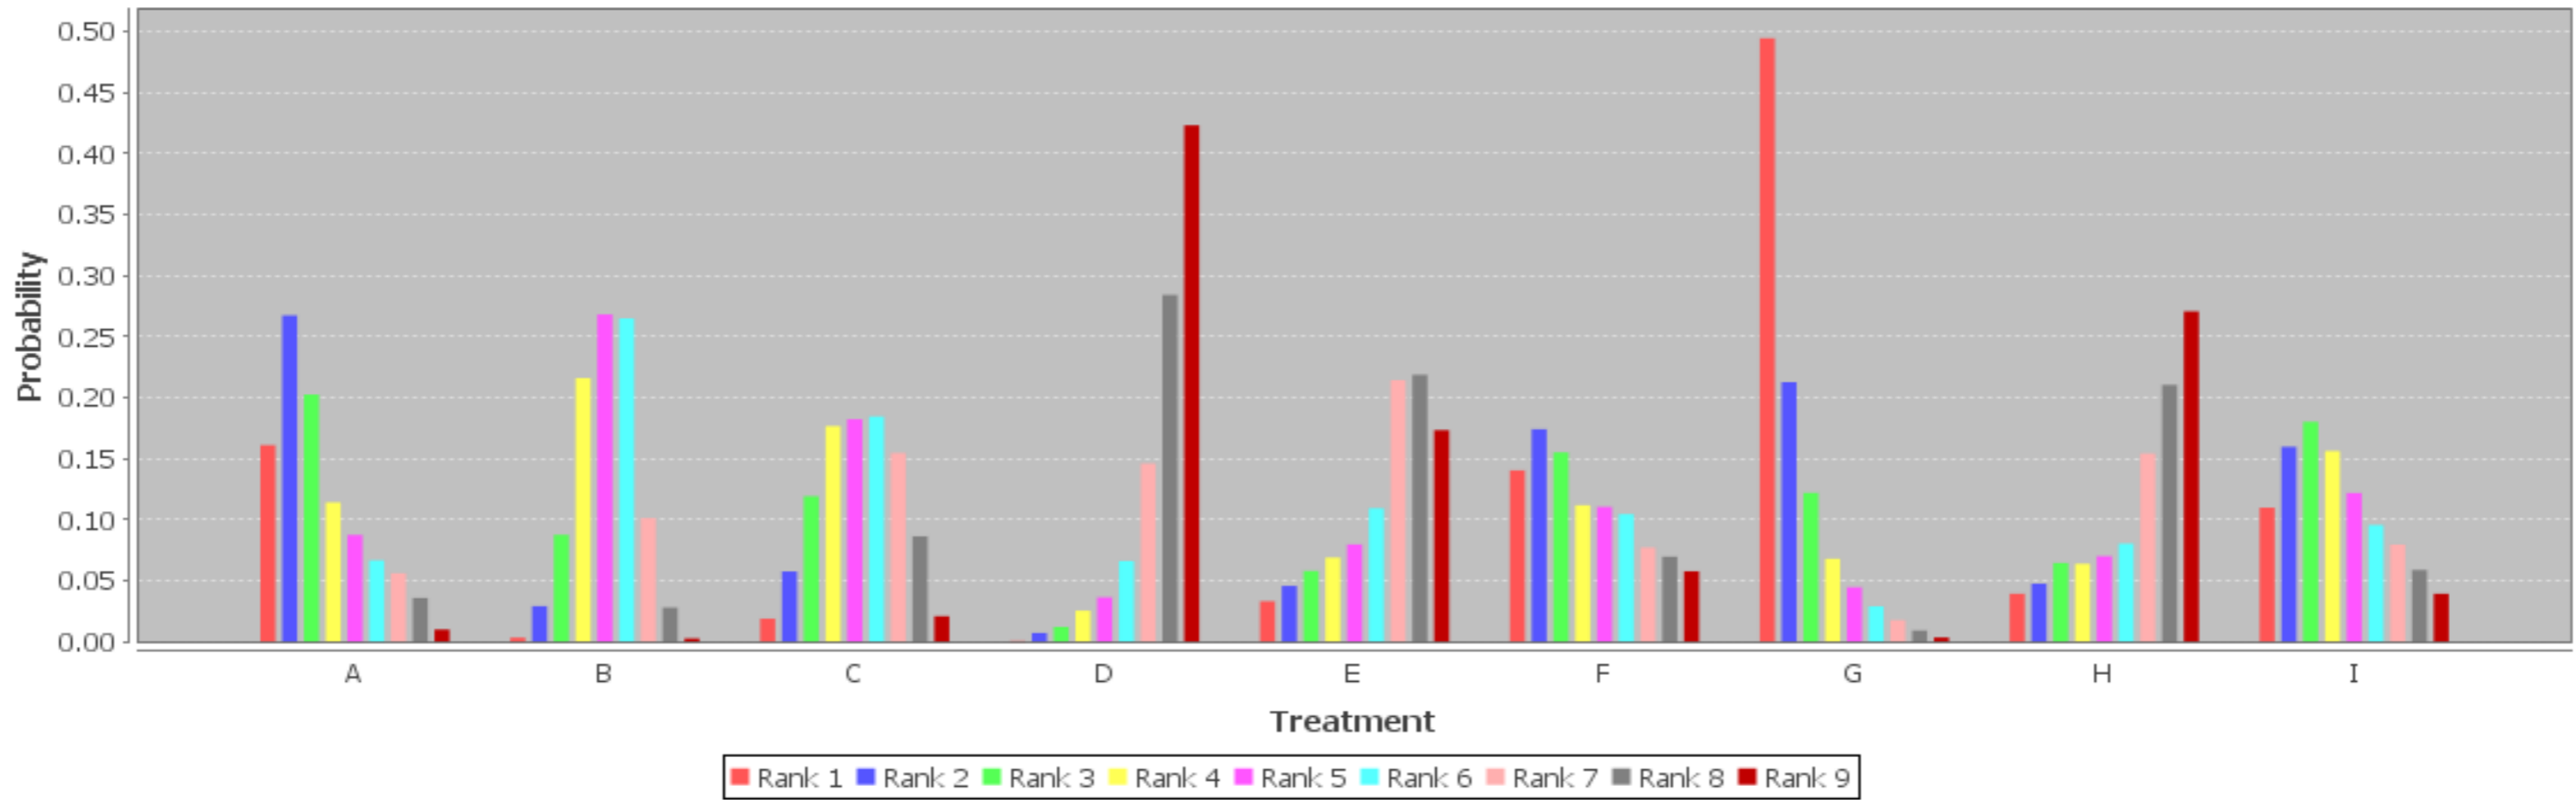

(B) Rank Probability

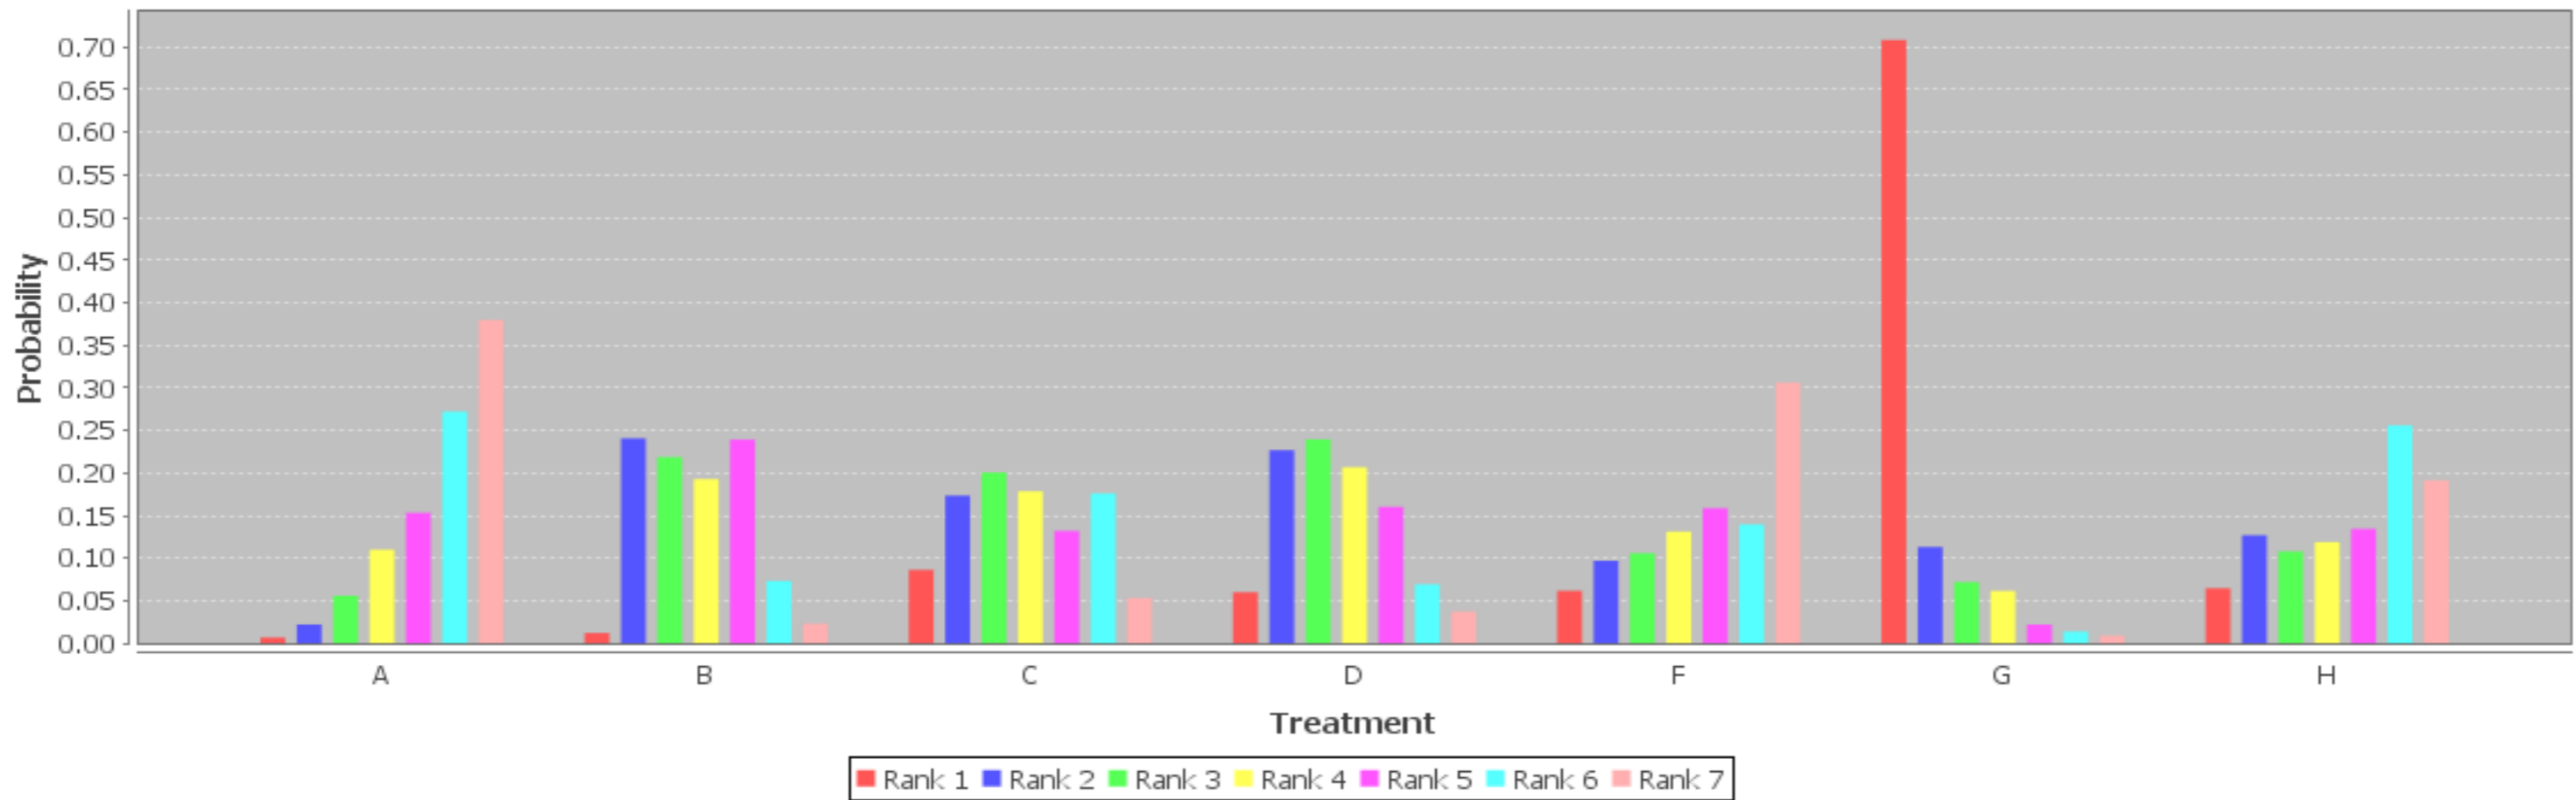

A, T-DM1; B, Lap- Cap; C, Tra-Cap; D, Cap; E, Ner; F, Per-Tra-Cap; G, Pyr-Cap; H, Ate-T-DM1; I, Ner-Cap  
T-DM1, trastuzumab emtansine; Lap, lapatinib; Tra, trastuzumab; Cap, capecitabine; Ner, neratinib; Per, pertuzumab; Pyr, pyrotinib; Ate, atezolizumab
